# Supplementary material for: Analysis of Premature Mortality from Cardio-Cerebrovascular Diseases in Bogotá (2010–2022): An Analytical and Classification-Based Machine Learning Approach
Source: Research Square preprint supplement (doi:10.21203/rs.3.rs-6976741/v1), 2025-11-11
Supplement: Supplementary file 1 [file 74b1fa1d93aefc8bd7eb466c.docx]

**Supplementary Material 1. MINIMAR**

| **Component** | **Description** |
| --- | --- |
| 1. Population and study setting | Population to which the model was applied |
| Population | Deaths among individuals aged 30 to 74 years due to cardiovascular diseases in Bogotá |
| Study setting | District-level scope, population-based (source: DANE vital statistics) |
| Data source | Data from the national microdata archive of DANE, open and anonymized |
| Population selection | All death records between 2010 and 2022 were included for individuals aged 30 to 74 years whose underlying cause of death corresponded to cardiovascular diseases, according to ICD-10 codes: I10–I15 (hypertensive diseases), I20–I25 (ischemic heart diseases), I60–I69 (cerebrovascular diseases), and I500 (heart failure). |
| **2. Demographic characteristics of the patient** | Characteristics of the deceased individuals |
| Age | Premature mortality: 30 to 74 yearsControl group: older than 75 years |
| Sex | In the study cohort (premature deaths), 58.8% were men (23,682 cases) and 41.2% were women (15,870 cases). In the control group (non-premature deaths), an inverse distribution was observed: 58.6% were women (40,983 cases) and 41.4% were men (28,946 cases). |
| **Place of death (geographic area)** | **Premature mortality group (ages 30–74):**  • Municipal capital (1): 24,718 cases (99.2%)  • Dispersed rural area (3): 157 cases (0.6%)  • Populated center (2): 23 cases (0.1%)  • No information (9): 13 cases (0.1%)  **Control group (≥75 years):**  • Municipal capital (1): 43,109 cases (99.8%)  • Dispersed rural area (3): 81 cases (0.2%)  • Populated center (2): 16 cases (0.0%)  • No information (9): 9 cases (0.0%) |
| **Place of death (type of site)** | **Premature mortality group (ages 30–74):**  • Hospital / Clinic (1): 27,240 cases (68.9%)  • Home / Residence (3): 10,696 cases (27.0%)  • Public road (5): 764 cases (1.9%)  • Other (6): 521 cases (1.3%)  • Workplace (4): 128 cases (0.3%)  • No information (9): 105 cases (0.3%)  • Health center / Post (2): 98 cases (0.2%)  **Control group (≥75 years):**  • Hospital / Clinic (1): 37,067 cases (53.0%)  • Home / Residence (3): 31,571 cases (45.1%)  • Other (6): 915 cases (1.3%)  • Public road (5): 196 cases (0.3%)  • No information (9): 81 cases (0.1%)  • Health center / Post (2): 70 cases (0.1%)  • Workplace (4): 29 cases (0.0%) |
| Educational level | **Premature mortality group (ages 30–74):**  • Primary education (2): 4,737 cases (40.0%)  • Secondary education (3): 1,650 cases (13.9%)  • Academic high school (4): 926 cases (7.8%)  • None (13): 593 cases (5.0%)  • University degree (9): 827 cases (7.0%)  • No information (99): 1,114 cases (9.4%)  • Vocational training (7): 248 cases (2.1%)  • Technological training (8): 165 cases (1.4%)  • Technical high school (5): 157 cases (1.3%)  • Preschool (1): 149 cases (1.3%)  • Specialization (10): 92 cases (0.8%)  • Master’s degree (11): 29 cases (0.2%)  • Normal school (6): 15 cases (0.1%)  • Doctorate (12): 13 cases (0.1%)  **Control group (≥75 years):**  • Primary education (2): 8,021 cases (41.6%) • None (13): 2,058 cases (10.7%) • Secondary education (3): 1,535 cases (8.0%) • University degree (9): 749 cases (3.9%) • No information (99): 1,545 cases (8.0%) • Academic high school (4): 620 cases (3.2%) • Vocational training (7): 204 cases (1.1%) • Technological training (8): 89 cases (0.5%) • Technical high school (5): 112 cases (0.6%) • Preschool (1): 292 cases (1.5%) • Specialization (10): 63 cases (0.3%) • Normal school (6): 73 cases (0.4%) • Master’s degree (11): 24 cases (0.1%) • Doctorate (12): 10 cases (0.1%) |
| Ethnic affiliation | **Premature mortality group (ages 30–74):**  • None of the above (6): 39,004 cases (98.6%)  • Afro-Colombian (5): 384 cases (1.0%)  • No information (9): 115 cases (0.3%)  • Raizal (2): 25 cases (0.1%)  • Indigenous (1): 13 cases (0.03%)  • Palenquero (3): 9 cases (0.02%)  • Rom (Gypsy) (4): 2 cases (0.01%)  **Control group (≥75 years):** • None of the above (6): 69,295 cases (99.1%) • Afro-Colombian (5): 362 cases (0.5%) • No information (9): 180 cases (0.3%) • Raizal (2): 49 cases (0.07%) • Indigenous (1): 31 cases (0.04%) • Rom (Gypsy) (4): 8 cases (0.01%) • Palenquero (3): 4 cases (0.01%) |
| Social Security Coverage | **Premature Mortality Group (ages 30–74):**   - Contributory (1): 21,505 cases (54.4%) - Subsidized (2): 12,847 cases (32.5%) - Exception (5): 2,284 cases (5.8%) - Special (3): 1,548 cases (3.9%) - Uninsured (9): 1,257 cases (3.2%) - No information (4): 111 cases (0.3%)   **Control Group (≥75 years):**   - Contributory (1): 42,523 cases (60.8%) - Subsidized (2): 20,096 cases (28.7%) - Special (3): 4,335 cases (6.2%) - Exception (5): 2,115 cases (3.0%) - Uninsured (9): 498 cases (0.7%) - No information (4): 362 cases (0.5%) |
| 3. Model Architecture | Premature Mortality |
| Model Outcome | Binary classification of premature mortality (ages 30 to 74) vs. non-premature mortality (≥75 years) |
| Target Users | District public health authorities and technical teams responsible for the surveillance of non-communicable diseases. Also intended for decision-makers, academic and research institutions, and personnel involved in governance and public health management. |
| Data Split | 70% training and 30% testing, with stratified sampling based on the outcome. This approach was applied to the general dataset and to each of the four subgroups by diagnostic category: ischemic heart disease, cerebrovascular disease, hypertensive disease, and heart failure. |
| Reference Standard (Gold Standard) | Deaths with cardiovascular underlying cause, identified by ICD-10 codes grouped under DANE’s list 667. |
| Model Type | Supervised binary classification. |
| Algorithms Used | Random Forest, Logistic Regression, Decision Tree, Support Vector Machines (SVM-RBF), and K-Nearest Neighbors (KNN). |
| Predictor Variables (Features) | Place of death (A_DEFUN), site of death (SIT_DEFUN), sex (SEXO), educational level (NIVEL_EDU), ethnic background (IDPERTET), health insurance scheme (SEG_SOCIAL), and grouped underlying cause of death (CAUSA_667). All variables were categorical, coded based on DANE's original structure. |
| Missing Data Handling | The analytical dataset had no missing data in the predictor variables; therefore, no imputation was necessary. |
| 4. Model Evaluation | Binary classification metrics: accuracy, precision, recall, F1-score, and AUC. |
| Hyperparameter Optimization | Performed through stratified cross-validation within the training set. |
| Internal Validation | 5-fold cross-validation applied to estimate model stability and prevent overfitting. |
| External Validation | No external validation was performed; the model was trained exclusively on mortality data from Bogotá (2010–2022). |
| Transparency | Code available upon request to the corresponding author. |
