# Supplementary material for: Analysis of Premature Mortality from Cardio-Cerebrovascular Diseases in Bogotá (2010–2022): An Analytical and Classification-Based Machine Learning Approach
Source: Research Square preprint supplement (doi:10.21203/rs.3.rs-6976741/v1), 2025-11-11
Supplement: Supplementary file 2 [file 82a0013c650beaad5be975b9.xlsx]

## Sheet: Hoja1
Nombre variable	Categorias	Categories
A_DEFUN	1=Cabecera municipal 2= Centro poblado 3=Rural disperso 9=sin información	1 = Urban center 2 = Populated center 3 = Dispersed rural area 9 = No information
SIT_DEFUN	1=Hospital/clínica 2= Centro/puesto de salud 3=Casa/domicilio 4=Lugar de trabajo 5=Vía pública 6=Otro 9=Sin información	1 = Hospital/clinic 2 = Health center/post 3 = Home/residence 4 = Workplace 5 = Public road 6 = Other 9 = No information
ANO	2010 - 2022	2010 - 2022
MES	1 a 12	1 a 12
SEXO	1=Masculino 2= Femeniino 3= Indeterminado	1 = Male 2 = Female 3 = Undetermined
GRU_ED1	14 = De 30 a 34 años 15 = De 35 a 39 años 16 = De 40 a 44 años 17 = De 45 a 49 años 18 = De 50 a 54 años 19 = De 55 a 59 años 20 = De 60 a 64 años 21 = De 65 a 69 años 22 = De 70 a 74 años 23 = De 75 a 79 años 24 = De 80 a 84 años 25 = De 85 a 89 años 26 = De 90 a 94 años 27 = De 95 a 99 años 28 = De 100 años y más 29 = Edad desconocida	14 = 30 to 34 years 15 = 35 to 39 years 16 = 40 to 44 years 17 = 45 to 49 years 18 = 50 to 54 years 19 = 55 to 59 years 20 = 60 to 64 years 21 = 65 to 69 years 22 = 70 to 74 years 23 = 75 to 79 years 24 = 80 to 84 years 25 = 85 to 89 years 26 = 90 to 94 years 27 = 95 to 99 years 28 = 100 years and over 29 = Unknown age
NIVEL_EDU	1 = Preescolar 2 = Básica primaria 3 = Básica secundaria 4 = Media académica o clásica 5 = Media técnica 6 = Normalista 7 = Técnica profesional 8 = Tecnológica 9 = Profesional 10 = Especialización 11 = Maestría 12 = Doctorado 13 = Ninguno 99 = Sin información	1 = Preschool 2 = Primary education 3 = Secondary education 4 = Academic or classical high school 5 = Technical high school 6 = Normalist teacher training 7 = Vocational technical education 8 = Technological education 9 = Professional degree 10 = Specialization 11 = Master’s degree 12 = Doctorate 13 = None 99 = No information
IDPERTET	1 = Indígena 2 = Rom (Gitano) 3 = Raizal del archipielago de San Andres y Providencia 4 = Palenquero de San Basilio 5 = Negro(a), mulato(a), afrocolombiano(a) o afrodescendiente 6 = Ninguno de las anteriores 9 = Sin infornmación	1 = Indigenous 2 = Rom (Gypsy) 3 = Raizal from the archipelago of San Andrés and Providencia 4 = Palenquero from San Basilio 5 = Black, mulatto, Afro-Colombian or of African descent 6 = None of the above 9 = No information
CODPTORE	11= Bogotá	11= Bogotá
SEG_SOCIAL	1= Contributivo 2= Subsidiado 3= Excepción 4= Especial 5= No asegurado 9= Sin información	1 = Contributory 2 = Subsidized 3 = Exception 4 = Special 5 = Uninsured 9 = No information
C_BAS1	Enfermedades cerebrovasculares (I60-I69) Enfermedades isquémicas del corazón (I20-I25) Enfermedades hipertensivas (I10-I15) Insuficiencia cardíaca, (I500)	Cerebrovascular diseases (I60–I69) Ischemic heart diseases (I20–I25) Hypertensive diseases (I10–I15) Heart failure (I500)
CAUSA_667	303=Enfermedades isquemicas del corazón 307= Enfermedades cerebrovasculares 302= Enfermedades hipertensivas 306= Insuficiencia cardiaca	303 = Ischemic heart diseases 307 = Cerebrovascular diseases 302 = Hypertensive diseases 306 = Heart failure
CAU_HOMOL	51=Enfermedades isquemicas del corazón 55= Enfermedades cerebrovasculares 50= Enfermedades hipertensivas 54= Insuficiencia cardiaca	51 = Ischemic heart diseases 55 = Cerebrovascular diseases 50 = Hypertensive diseases 54 = Heart failure
